# Supplementary material for: Genetic Diversity and DNA Barcoding of Thrips in Bangladesh
Source: MDPI journal article supplement (doi:10.3390/insects15020107), 2024-02-03
Supplement: s1 [file s1]

**Table S1.** Information about the collection sites and host plants of thrips from Bangladesh

| Sample no.     | Collection date | Host Plant                | Location                         | Name of species     | Latitude and longitude                   | Accession number |
|----------------|-----------------|---------------------------|----------------------------------|---------------------|------------------------------------------|------------------|
| Rang-Br-01     | 2021.11.17      | <i>Solanum melongena</i>  | Sankarpur, Badarganj, Rangpur    | <i>Thrips palmi</i> | 25° 40' 11.1288" N<br>89° 3' 19.764" E   | OR481072         |
| Rang-Br-09     | 2021.11.17      | <i>Solanum melongena</i>  | Palichora, Mithapukur, Rangpur   | <i>Thrips palmi</i> | 25° 44' 26.088" N<br>89° 15' 40.1004" E  | OR481073         |
| Dinaj-Br-11    | 2021.12.24      | <i>Solanum melongena</i>  | Pakerhut, Khansama, Dinajpur     | <i>Thrips palmi</i> | 25° 37' 18.8004" N<br>88° 38' 18.5604" E | OR481074         |
| Nil-Be-15      | 2021.12.28      | <i>Phaseolus vulgaris</i> | Kuthipara, Sadar, Nilphamari     | <i>Thrips palmi</i> | 25° 56' 35.232" N<br>89° 3' 48.744" E    | OR481075         |
| Lal-Br-18      | 2022.01.19      | <i>Solanum melongena</i>  | Kakina, Kaliganj, Lalmonirhut    | <i>Thrips palmi</i> | 23° 43' 15.996" N<br>88° 14' 24.864" E   | OR481076         |
| Panch-Be-26    | 2022.02.15      | <i>Phaseolus vulgaris</i> | Daviganj, Panchagarh             | <i>Thrips palmi</i> | 26° 18' 47.7612" N<br>88° 31' 28.1964" E | OR481077         |
| Panch-Pump-28  | 2022.02.15      | <i>Cucurbita moschata</i> | Daviganj, Panchagarh             | <i>Thrips palmi</i> | 26° 18' 47.7612" N<br>88° 31' 28.1964" E | OR481078         |
| Nil-Br-14      | 2021.12.28      | <i>Solanum melongena</i>  | Kuthipara, Sadar, Nilphamari     | <i>Thrips palmi</i> | 25° 56' 35.232" N<br>89° 3' 48.744" E    | OR481079         |
| Lal-Pump-20    | 2022.01.19      | <i>Cucurbita moschata</i> | Biman Bandor, Sadar, Lalmonirhut | <i>Thrips palmi</i> | 25° 44' 26.088" N<br>89° 15' 40.104" E   | OR481080         |
| Lal-Br-21      | 2022.01.19      | <i>Solanum melongena</i>  | Biman Bandor, Sadar, Lalmonirhut | <i>Thrips palmi</i> | 25° 44' 26.088" N<br>89° 15' 40.104" E   | OR481081         |
| Kuri-Cucum-23  | 2022.01.19      | <i>Cucumis sativus</i>    | Singerdubri, Rajarhut, Kurigram  | <i>Thrips palmi</i> | 25° 44' 26.088" N<br>89° 15' 40.1004" E  | OR481082         |
| Kuri-Br-25     | 2022.01.19      | <i>Solanum melongena</i>  | Singerdubri, Rajarhut, Kurigram  | <i>Thrips palmi</i> | 25° 44' 26.088" N<br>89° 15' 40.1004" E  | OR481083         |
| Panch-Br-27    | 2022.02.15      | <i>Solanum melongena</i>  | Daviganj, Panchagarh             | <i>Thrips palmi</i> | 26° 18' 47.7612" N<br>88° 31' 28.1964" E | OR481084         |
| Joy-Cucum-32   | 2022.01.27      | <i>Cucumis sativus</i>    | Panchbibi, Joypurhat             | <i>Thrips palmi</i> | 25° 12' 27.1332" N<br>89° 4' 25.7592" E  | OR481085         |
| Thakur-Pump-37 | 2022.04.06      | <i>Cucurbita moschata</i> | Pirganj, Thakurgao               | <i>Thrips palmi</i> | 26° 1' 55.5636" N<br>88° 27' 38.5776" E  | OR481086         |
| Thakur-Ash-38  | 2022.04.06      | <i>Benincasa hispida</i>  | Pirganj, Thakurgao               | <i>Thrips palmi</i> | 26° 1' 55.5636" N<br>88° 27' 38.5776" E  | OR481087         |
| Bog-Ridge-44   | 2022.07.08      | <i>Luffa acutangula</i>   | Shantahar, Bogura                | <i>Thrips palmi</i> | 24° 48' 3.672" N                         | OR481088         |

|                |            |                               |                                       |                     |                                          |          |
|----------------|------------|-------------------------------|---------------------------------------|---------------------|------------------------------------------|----------|
| Dinaj-Ash-46   | 2022.07.14 | <i>Benincasa hispida</i>      | Parbotipur, Dinajpur                  | <i>Thrips palmi</i> | 88° 59' 14.352" E<br>25° 37' 18.804" N   | OR481089 |
| Bag-Br-Khul3   | 2022.02.05 | <i>Solanum melongena</i>      | Chitolmari, Bagerhat                  | <i>Thrips palmi</i> | 88° 38' 18.564" E<br>22° 39' 32.616" N   | OR481090 |
| Bag-Mari-Khul4 | 2022.02.14 | <i>Calendula arvensis</i>     | Chitolmari, Bagerhat                  | <i>Thrips palmi</i> | 89° 48' 25.236" E<br>22° 39' 32.616" N   | OR481091 |
| Gazi-Ro-G5     | 2022.12.22 | <i>Rosa scinensis</i>         | Gazipur                               | <i>Thrips palmi</i> | 89° 48' 25.236" E<br>24° 5' 44.9448" N   | OR481092 |
| Mymen-Br-M2    | 2022.08.07 | <i>Solanum melongena</i>      | Mymenshing                            | <i>Thrips palmi</i> | 90° 24' 45.0756" E<br>24° 44' 21.8292" N | OR481093 |
| Noa-Br-N2      | 2022.08.07 | <i>Solanum melongena</i>      | Noakhali                              | <i>Thrips palmi</i> | 90° 24' 28.7352" E<br>22° 48' 30.4956" N | OR481094 |
| Khag-Br-K1     | 2022.11.26 | <i>Solanum melongena</i>      | Khagrachori                           | <i>Thrips palmi</i> | 91° 6' 59.0148" E<br>23° 4' 19.8876" N   | OR481095 |
| Rang-Br-B1     | 2023.01.01 | <i>Solanum melongena</i>      | Parbotipur Badarganj                  | <i>Thrips palmi</i> | 92° 0' 34.2324" E<br>25° 44' 26.088" N   | OR481096 |
| Khag-Ok-K7     | 2023.01.01 | <i>Abelmoschus esculentus</i> | Khagrachori                           | <i>Thrips palmi</i> | 89° 15' 40.104" E<br>23° 4' 19.8876" N   | OR481097 |
| Brah-Br-1      | 2023.02.03 | <i>Solanum melongena</i>      | Brahmanbaria                          | <i>Thrips palmi</i> | 92° 0' 34.2324" E<br>23° 57' 50.9112" N  | OR481098 |
| Rang-Mari-06   | 2021.11.17 | <i>Calendula arvensis</i>     | Soddopuscorni,<br>Mithapukur, Rangpur | <i>Thrips palmi</i> | 91° 7' 5.8836" E<br>25° 44' 26.088" N    | OR481099 |
| Khag-T0-K4     | 2022.12.17 | <i>Solanum lycopersicum</i>   | Khagrachori                           | <i>Thrips palmi</i> | 89° 15' 40.104" E<br>23° 4' 19.8876" N   | OR481100 |
| Bog-Ash-42     | 2022.07.08 | <i>Benincasa hispida</i>      | Comarpur, Bogura                      | <i>Thrips palmi</i> | 92° 0' 34.2324" E<br>24° 48' 3.672" N    | OR481101 |
| Bog-Be-45      | 2022.07.08 | <i>Phaseolus vulgaris</i>     | Comarpur, Bogura                      | <i>Thrips palmi</i> | 88° 59' 14.352" E<br>24° 48' 3.672" N    | OR481102 |
| Rang-Ridge-41  | 2022.04.06 | <i>Luffa acutangula</i>       | Kalamtol, Badarganj<br>Rangpur        | <i>Thrips palmi</i> | 88° 59' 14.352" E<br>25° 44' 26.088" N   | OR481103 |
| Dinaj-Br-48    | 2022.07.14 | <i>Solanum melongena</i>      | Parbotipur dinajpur                   | <i>Thrips palmi</i> | 89° 15' 40.104" E<br>25° 37' 18.804" N   | OR481104 |
| Dinaj-Pump-49  | 2022.07.14 | <i>Cucurbita moschata</i>     | Parbotipur dinajpur                   | <i>Thrips palmi</i> | 88° 38' 18.564" E<br>25° 37' 18.804" N   | OR481105 |
| Rang-Bi-33     | 2022.03.04 | <i>Momordica charantia</i>    | Kalirhat, Badarganj<br>Rangpur        | <i>Thrips palmi</i> | 88° 38' 18.564" E<br>25° 44' 26.088" N   | OR481106 |
|                |            |                               |                                       |                     | 89° 15' 40.104" E                        |          |

|                |            |                           |                                           |                             |                                          |          |
|----------------|------------|---------------------------|-------------------------------------------|-----------------------------|------------------------------------------|----------|
| Khag-Mari-K6   | 2023.01.01 | <i>Calendula arvensis</i> | Khagrachori                               | <i>Thrips palmi</i>         | 23° 4' 19.8876" N<br>92° 0' 34.2324" E   | OR481107 |
| Gazi-Ch-1      | 2022.12.22 | <i>Capsicum annuum</i>    | Gazipur                                   | <i>Haplothrips sp.</i>      | 24° 5' 44.9448" N<br>90° 24' 45.0756" E  | OR482070 |
| Gazi-Co-1.3    | 2022.12.22 | <i>Gossypium hirsutum</i> | Gazipur                                   | <i>Haplothrips sp.</i>      | 24° 5' 44.9448" N<br>90° 24' 45.0756" E  | OR482071 |
| Brah-Ch-H1     | 2023.02.03 | <i>Capsicum annuum</i>    | Brahmanbaria                              | <i>Haplothrips sp</i>       | 23° 57' 50.9112" N<br>91° 7' 5.8836" E   | OR482072 |
| Rang-Ro-7.1    | 2021.11.17 | <i>Celosia argentea</i>   | Soddopuscorni,<br>Mithapukur, Rangpur     | <i>Haplothrips bagrolis</i> | 25° 44' 26.088" N<br>89° 15' 40.104" E   | OR482073 |
| Rang-Ro-7.2    | 2021.11.17 | <i>Celosia argentea</i>   | Soddopuscorni,<br>Mithapukur, Rangpur     | <i>Haplothrips bagrolis</i> | 25° 44' 26.088" N<br>89° 15' 40.104" E   | OR482074 |
| Bag-Ro-Khul9.1 | 2022.02.14 | <i>Rosa scinensis</i>     | Chitolmari, Bagerhat                      | <i>Haplothrips andresi</i>  | 22° 39' 32.616" N<br>89° 48' 25.236" E   | OR482075 |
| Bag-Ro-Khul9.2 | 2022.02.14 | <i>Rosa scinensis</i>     | Chitolmari, Bagerhat                      | <i>Haplothrips andresi</i>  | 22° 39' 32.616" N<br>89° 48' 25.236" E   | OR482076 |
| Khag-Nag-K2    | 2022.11.26 | <i>Plumeria sp</i>        | Khagrachori                               | <i>Phlaeothripidae sp</i>   | 23° 4' 19.8876" N<br>92° 0' 34.2324" E   | OR482077 |
| Khag-Nag-K2.3  | 2022.11.26 | <i>Plumeria sp</i>        | Khagrachori                               | <i>Phlaeothripidae sp</i>   | 23° 4' 19.8876" N<br>92° 0' 34.2324" E   | OR482078 |
| Khan-Mari-12   | 2021.12.24 | <i>Calendula arvensis</i> | Pakerhut, Khansama,<br>Dinajpur           | <i>Thrips parvispinus</i>   | 25° 37' 18.8004" N<br>88° 38' 18.5604" E | OR482079 |
| Khan-Mari-12.3 | 2021.12.24 | <i>Calendula arvensis</i> | Pakerhut, Khansama,<br>Dinajpur           | <i>Thrips parvispinus</i>   | 25° 37' 18.8004" N<br>88° 38' 18.5604" E | OR482080 |
| Joy-Cucum-32.1 | 2022.01.27 | <i>Cucumis sativus</i>    | Panchbibi, Joypurhat                      | <i>Thrips parvispinus</i>   | 25° 12' 27.1332" N<br>89° 4' 25.7592" E  | OR482081 |
| Lal-Ch-35      | 2022.04.28 | <i>Capsicum annuum</i>    | Naowdabash,<br>Hatibandha,<br>Lalmonirhat | <i>Thrips parvispinus</i>   | 25° 54' 58.9896" N<br>89° 26' 46.0356" E | OR482082 |
| Rang-Br-1.4    | 2021.11.17 | <i>Solanum melongena</i>  | Sankarpur, Badarganj,<br>Rangpur          | <i>Thrips parvispinus</i>   | 25° 40' 11.1288" N<br>89° 3' 19.764" E   | OR482083 |
| Rang-Ch-3.4    | 2021.11.17 | <i>Capsicum annuum</i>    | Sankarpur, Badarganj,<br>Rangpur          | <i>Thrips parvispinus</i>   | 25° 40' 11.1288" N<br>89° 3' 19.764" E   | OR482084 |
| Joy-Ch-31      | 2022.01.27 | <i>Capsicum annuum</i>    | Panchbibi, Joypurhat                      | <i>Thrips parvispinus</i>   | 25° 12' 27.1332" N<br>89° 4' 25.7592" E  | OR482085 |
| Raj-Ch-R3.3    | 2022.07.23 | <i>Capsicum annuum</i>    | Rajshahi                                  | <i>Thrips parvispinus</i>   | 24° 21' 48.9168" N<br>88° 37' 26.8968" E | OR482086 |

|                  |            |                           |                                       |                                       |                                         |          |
|------------------|------------|---------------------------|---------------------------------------|---------------------------------------|-----------------------------------------|----------|
| Rang-Br-C1       | 2023.01.01 | <i>Solanum melongena</i>  | Boirumpur, Badarganj                  | <i>Thrips parvispinus</i>             | 25° 44' 26.088" N<br>89° 15' 40.104" E  | OR482087 |
| Nil-Ch-34        | 2022.04.10 | <i>Capsicum annuum</i>    | Khuthipara sadar,<br>Nilphamari       | <i>Thrips parvispinus</i>             | 25° 56' 5.532" N<br>88° 51' 21.2544" E  | OR482088 |
| Dinaj-Ch-47      | 2022.07.14 | <i>Capsicum annuum</i>    | Parbotipur, Dinajpur                  | <i>Thrips subnudula</i>               | 25° 37' 18.804" N<br>88° 38' 18.564" E  | OR482089 |
| Rang-Be-2        | 2021.11.17 | <i>Phaseolus vulgaris</i> | Sankarpur, Badarganj,<br>Rangpur      | <i>Thrips hawaiiensis</i>             | 25° 40' 11.1288" N<br>89° 3' 19.764" E  | OR482090 |
| Kuri-Mus-22      | 2022.01.19 | <i>Brassica rapa</i>      | Singerdubri, Rajarhut,<br>Kurigram    | <i>Thrips hawaiiensis</i>             | 25° 44' 26.088" N<br>89° 15' 40.1004" E | OR482091 |
| Gazi-Co-T3       | 2022.06.12 | <i>Gossypium hirsutum</i> | Gazipur                               | <i>Thrips hawaiiensis</i>             | 24° 5' 44.9448" N<br>90° 24' 45.0756" E | OR482092 |
| Khag-Rap-K5      | 2023.01.01 | <i>Brassica rapa</i>      | Khagrachori                           | <i>Thrips hawaiiensis</i>             | 23° 4' 19.8876" N<br>92° 0' 34.2324" E  | OR482093 |
| Gazi-Co-1.4      | 2022.12.22 | <i>Gossypium hirsutum</i> | Gazipur                               | <i>Thrips hawaiiensis</i>             | 24° 5' 44.9448" N<br>90° 24' 45.0756" E | OR482094 |
| Gazi-Mari-F1     | 2022.12.22 | <i>Calendula arvensis</i> | Gazipur                               | <i>Thrips hawaiiensis</i>             | 24° 5' 44.9448" N<br>90° 24' 45.0756" E | OR482095 |
| Bag-Mari-Khul4   | 2022.02.14 | <i>Calendula arvensis</i> | Chitolmari, Bagerhat                  | <i>Thrips hawaiiensis</i>             | 22° 39' 32.616" N<br>89° 48' 25.236" E  | OR482096 |
| Rang-Mari-6      | 2021.11.17 | <i>Calendula arvensis</i> | Soddopuscorni,<br>Mithapukur, Rangpur | <i>Thrips hawaiiensis</i>             | 25° 44' 26.088" N<br>89° 15' 40.104" E  | OR482097 |
| Lal-Be-19        | 2022.01.19 | <i>Phaseolus vulgaris</i> | Kakina, Kaliganj,<br>Lalmonirhat      | <i>Thrips florum</i>                  | 23° 43' 15.996" N<br>88° 14' 24.864" E  | OR482098 |
| Gazi-Co-T5       | 2022.12.22 | <i>Gossypium hirsutum</i> | Gazipur                               | <i>Thrips florum</i>                  | 24° 5' 44.9448" N<br>90° 24' 45.0756" E | OR482099 |
| Rang-Ro-D1       | 2023.01.03 | <i>Rosa scinensis</i>     | Badarganj, Rangpur                    | <i>Thrips florum</i>                  | 25° 44' 26.088" N<br>89° 15' 40.104" E  | OR482100 |
| Joy-Le-30        | 2022.01.27 | <i>Citrus limon</i>       | Panchbibbi, Joypurhat                 | <i>Thrips florum</i>                  | 25° 12' 27.1332" N<br>89° 4' 25.7592" E | OR482101 |
| Bag-Mari-Khul4.3 | 2022.02.14 | <i>Calendula arvensis</i> | Chitolmari, Bagerhat                  | <i>Microcephalothrips abdominalis</i> | 22° 39' 32.616" N<br>89° 48' 25.236" E  | OR482102 |
| Dinaj-SP-A1.3    | 2022.12.04 | <i>Ipomoea batatas</i>    | Parbotipur Badarganj                  | <i>Dendrothripoides innoxius</i>      | 25° 44' 26.088" N<br>89° 15' 40.104" E  | OR482103 |
| Dinaj-SP-A1.4    | 2022.12.04 | <i>Ipomoea batatas</i>    | Parbotipur Badarganj                  | <i>Dendrothripoides innoxius</i>      | 25° 44' 26.088" N<br>89° 15' 40.104" E  | OR482104 |
| Brah-Ga-G1.2     | 2023.02.03 | <i>Allium sativum</i>     | Brahmanbaria                          | <i>Thrips tabaci</i>                  | 23° 57' 50.9112" N                      | OR482105 |

|                   |            |                            |                                     |                                    |                                          |          |
|-------------------|------------|----------------------------|-------------------------------------|------------------------------------|------------------------------------------|----------|
| Brah-Ga-G1.3      | 2023.02.03 | <i>Allium sativum</i>      | Brahmanbaria                        | <i>Thrips tabaci</i>               | 91° 7' 5.8836" E<br>23° 57' 50.9112" N   | OR482106 |
| Brah-Ga-G1.4      | 2023.02.03 | <i>Allium sativum</i>      | Brahmanbaria                        | <i>Thrips tabaci</i>               | 91° 7' 5.8836" E<br>23° 57' 50.9112" N   | OR482107 |
| Rang-Ro-4.2       | 2021.11.17 | <i>Rosa scinensis</i>      | Soddopuscorni,<br>Rangpur           | <i>Frankliniella intonsa</i>       | 91° 7' 5.8836" E<br>25° 44' 26.088" N    | OR482108 |
| Lal-Br-18.1       | 2022.01.19 | <i>Solanum melongena</i>   | Kakina, Kaliganj,<br>Lalmonirhut    | <i>Frankliniella intonsa</i>       | 89° 15' 40.104" E<br>23° 43' 15.996" N   | OR482109 |
| Lal-Pump-<br>20.4 | 2022.01.19 | <i>Cucurbita moschata</i>  | Biman Bandor, Sadar,<br>Lalmonirhut | <i>Frankliniella intonsa</i>       | 88° 14' 24.864" E<br>25° 44' 26.088" N   | OR482110 |
| Gazi-Ro-R1.3      | 2022.12.22 | <i>Rosa scinensis</i>      | Gazipur                             | <i>Astrothrips tumiceps</i>        | 89° 15' 40.104" E<br>24° 5' 44.9448" N   | OR482111 |
| Brah-Be-1.2       | 2023.02.03 | <i>Phaseolus vulgaris</i>  | Brahmanbaria                        | <i>Megalurothrips<br/>usitatus</i> | 90° 24' 45.0756" E<br>23° 57' 50.9112" N | OR482112 |
| Rang-Bi-33.3      | 2022.03.04 | <i>Momordica charantia</i> | Kalirhat, Badarganj<br>Rangpur      | <i>Megalurothrips<br/>usitatus</i> | 91° 7' 5.8836" E<br>25° 44' 26.088" N    | OR482113 |
| Nil-Yard-16       | 2021.12.28 | <i>Vigna unguiculata</i>   | Kuthipara, Sadar,<br>Nilphamari     | <i>Megalurothrips<br/>usitatus</i> | 89° 15' 40.104" E<br>25° 56' 35.232" N   | OR482114 |
| Dinaj-Be-10       | 2021.12.24 | <i>Phaseolus vulgaris</i>  | Pakerhut, Khansama,<br>Dinajpur     | <i>Megalurothrips<br/>usitatus</i> | 89° 3' 48.744" E<br>25° 37' 18.8004" N   | OR482115 |
| Rang-Br-9         | 2021.11.17 | <i>Solanum melongena</i>   | Palichora, Mithapukur,<br>Rangpur   | <i>Megalurothrips<br/>usitatus</i> | 88° 38' 18.5604" E<br>25° 44' 26.088" N  | OR482116 |
| Rang-Be-8         | 2021.11.17 | <i>Phaseolus vulgaris</i>  | Palichora, Mithapukur,<br>Rangpur   | <i>Megalurothrips<br/>usitatus</i> | 89° 15' 40.1004" E<br>25° 44' 26.088" N  | OR482117 |
| Khag-Be-K3        | 2022.11.26 | <i>Phaseolus vulgaris</i>  | Khagrachori                         | <i>Megalurothrips<br/>usitatus</i> | 89° 15' 40.1004" E<br>23° 4' 19.8876" N  | OR482118 |
| Rang-Be-8.1       | 2021.11.17 | <i>Phaseolus vulgaris</i>  | Palichora, Mithapukur,<br>Rangpur   | <i>Megalurothrips<br/>usitatus</i> | 92° 0' 34.2324" E<br>25° 44' 26.088" N   | OR482119 |
| Rang-Ro-D1.1      | 2023.01.03 | <i>Rosa scinensis</i>      | Badarganj, Rangpur                  | <i>Megalurothrips<br/>usitatus</i> | 89° 15' 40.1004" E<br>25° 44' 26.088" N  | OR482120 |
| Nil-SG-17         | 2021.12.28 | <i>Luffa cylindrica</i>    | Kuthipara, Sadar,<br>Nilphamari     | <i>Megalurothrips<br/>usitatus</i> | 89° 15' 40.104" E<br>25° 56' 35.232" N   | OR482121 |
| Lal-Be-19.1       | 2022.01.19 | <i>Phaseolus vulgaris</i>  | Kakina, Kaliganj,<br>Lalmonirhut    | <i>Megalurothrips<br/>usitatus</i> | 89° 3' 48.744" E<br>23° 43' 15.996" N    | OR482122 |
| Nil-Be-15.3       | 2021.12.28 | <i>Phaseolus vulgaris</i>  | Kuthipara, Sadar,<br>Nilphamari     | <i>Megalurothrips<br/>usitatus</i> | 88° 14' 24.864" E<br>25° 56' 35.232" N   | OR482123 |

|               |            |                           |                               |                                |                                          |          |
|---------------|------------|---------------------------|-------------------------------|--------------------------------|------------------------------------------|----------|
| Rang-Be-2.4   | 2021.11.17 | <i>Phaseolus vulgaris</i> | Sankarpur, Badarganj, Rangpur | <i>Megalurothrips usitatus</i> | 25° 40' 11.1288" N<br>89° 3' 19.764" E   | OR482124 |
| Dinaj-Mus-13  | 2021.12.24 | <i>Brassica rapa</i>      | Pakerhut, Khansama, Dinajpur  | <i>Megalurothrips distalis</i> | 25° 37' 18.8004" N<br>88° 38' 18.5604" E | OR482125 |
| Rang-Ro-D1.3  | 2023.01.03 | <i>Rosa scinensis</i>     | Badarganj, Rangpur            | <i>Megalurothrips distalis</i> | 25° 44' 26.088" N<br>89° 15' 40.104" E   | OR482126 |
| Dinaj-Ch-47.3 | 2022.07.14 | <i>Capsicum annuum</i>    | Parbotipur, Dinajpur          | <i>Scirtothrips dorsalis</i>   | 25° 37' 18.804" N<br>88° 38' 18.564" E   | OR482127 |
| Dinaj-Ch-47.4 | 2022.07.14 | <i>Capsicum annuum</i>    | Parbotipur, Dinajpur          | <i>Scirtothrips dorsalis</i>   | 25° 37' 18.804" N<br>88° 38' 18.564" E   | OR482128 |
| Joy- Ch-31.3  | 2022.01.27 | <i>Capsicum annuum</i>    | Panchbibi, Joypurhat          | <i>Scirtothrips dorsalis</i>   | 25° 12' 27.1332" N<br>89° 4' 25.7592" E  | OR482129 |
| Dinaj-SP-A1.1 | 2022.12.04 | <i>Ipomoea batatas</i>    | Parbotipur Badarganj          | <i>Bathrips melanicornis</i>   | 25° 44' 26.088" N<br>89° 15' 40.104" E   | OR482130 |
| Raj-Mari-R2.1 | 2022.07.23 | <i>Calendula arvensis</i> | Rajshahi                      | <i>Ayyaria chaetophora</i>     | 24° 21' 48.9168" N<br>88° 37' 26.8968" E | OR482131 |
| Raj-Ch-R2.3   | 2022.07.23 | <i>Calendula arvensis</i> | Rajshahi                      | <i>Ayyaria chaetophora</i>     | 24° 21' 48.9168" N<br>88° 37' 26.8968" E | OR482132 |
| Raj-Ch-R3.1   | 2022.07.23 | <i>Calendula arvensis</i> | Rajshahi                      | <i>Ayyaria chaetophora</i>     | 24° 21' 48.9168" N<br>88° 37' 26.8968" E | OR482133 |

---

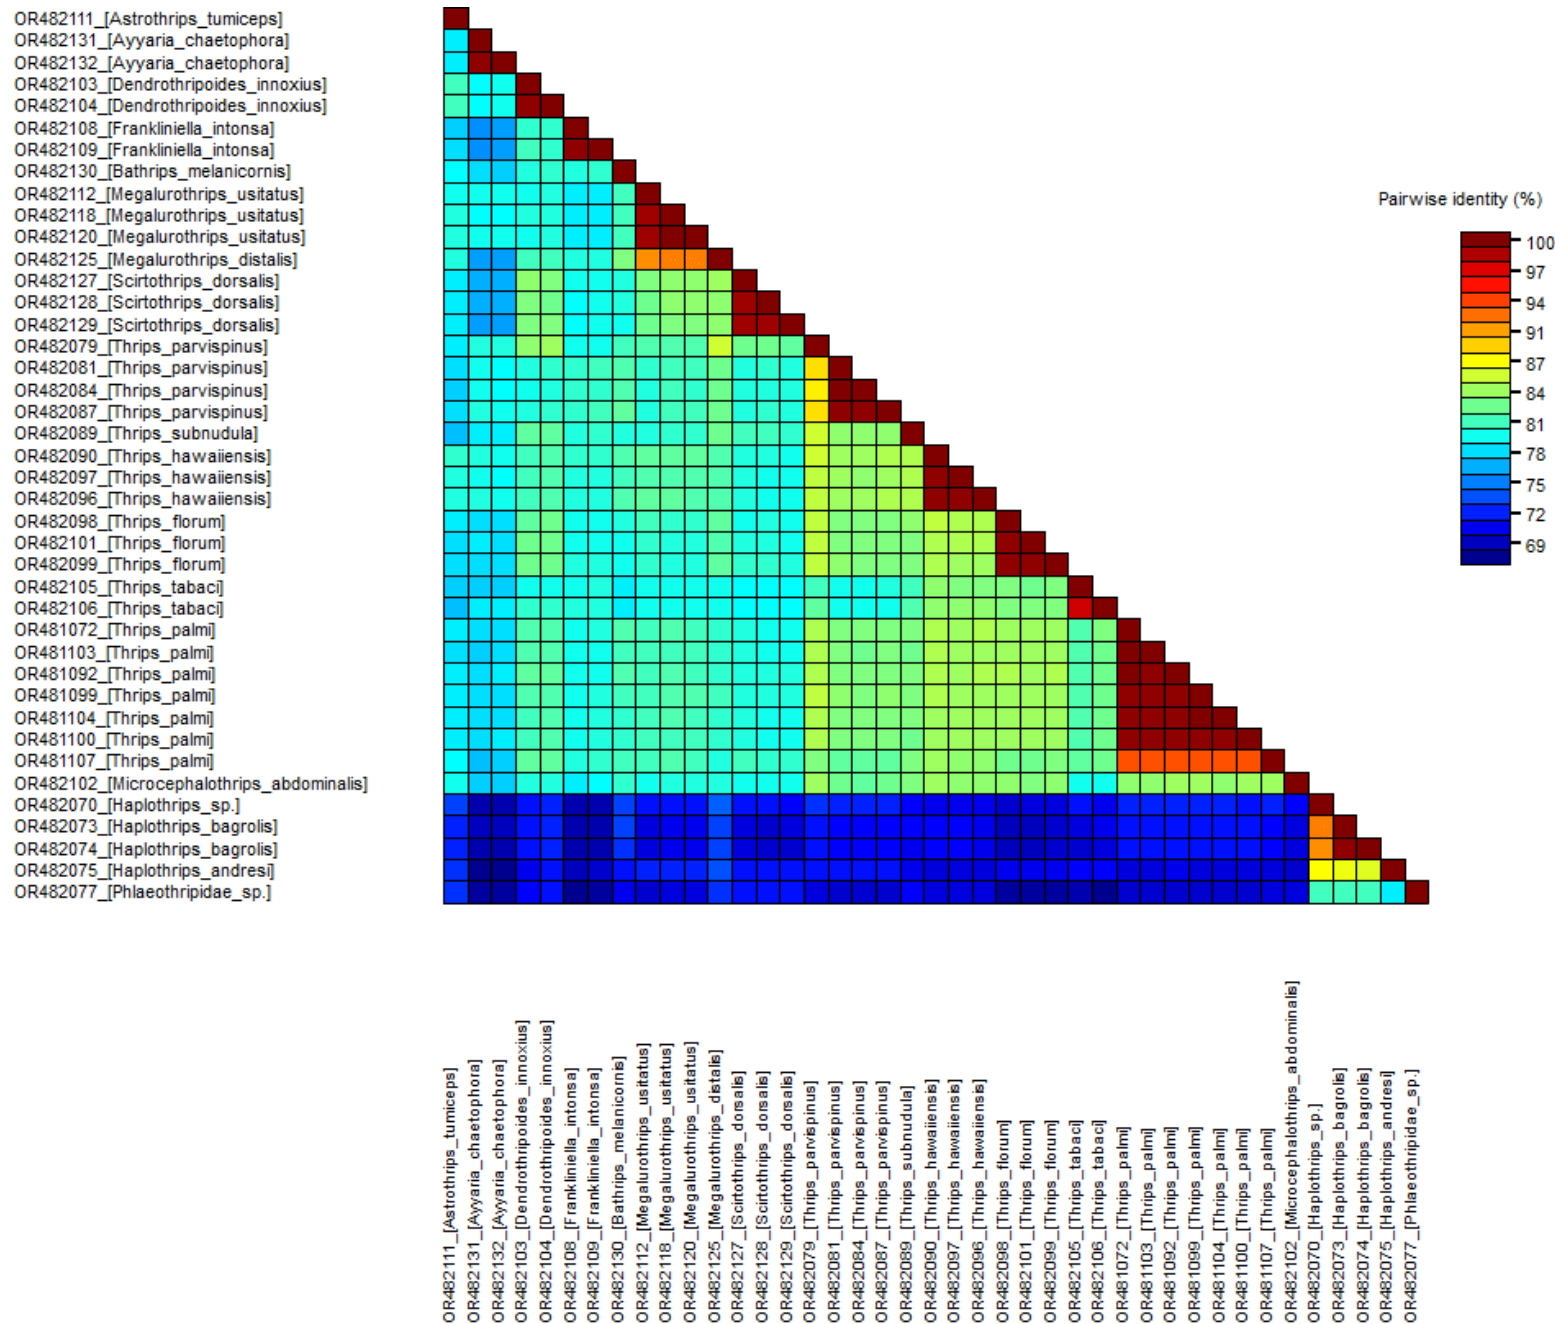

**Figure S1.** Pairwise nucleotide sequences identity color distance matrix for thrips species calculated by SDT v1.2.

**Table S2.** Inter-species divergence of thrips in Bangladesh, p-distance at lower left and Kimura 2 parameters at upper right and intraspecific distances showed in the text

| Species                               | <i>Thrips palmi</i> | <i>Thrips parvispinus</i> | <i>Thrips hawaiiensis</i> | <i>Thrips florum</i> | <i>Thrips tabaci</i> | <i>Thrips subnudula</i> | <i>Frankliniella intonsa</i> | <i>Megalurothrips usitatus</i> | <i>Megalurothrips distalis</i> | <i>Scirtothrips dorsalis</i> | <i>Ayyaria chaetophora</i> | <i>Haplothrips</i> sp. | <i>Haplothrips bagrolis</i> | <i>Haplothrips andresi</i> | <i>Phlaeothripidae</i> sp. | <i>Dendrothripoides innoxius</i> | <i>Microcephalothrips abdominalis</i> | <i>Astrothrips tumiceps</i> | <i>Bathrips melanicornis</i> |
|---------------------------------------|---------------------|---------------------------|---------------------------|----------------------|----------------------|-------------------------|------------------------------|--------------------------------|--------------------------------|------------------------------|----------------------------|------------------------|-----------------------------|----------------------------|----------------------------|----------------------------------|---------------------------------------|-----------------------------|------------------------------|
| <i>Thrips palmi</i>                   | -                   | 0.1958                    | 0.1726                    | 0.1754               | 0.1902               | 0.1868                  | 0.2328                       | 0.2016                         | 0.2184                         | 0.2247                       | 0.2510                     | 0.3651                 | 0.3689                      | 0.4070                     | 0.3895                     | 0.1996                           | 0.1811                                | 0.2364                      | 0.1984                       |
| <i>Thrips parvispinus</i>             | 0.1718              | -                         | 0.1634                    | 0.1904               | 0.2286               | 0.1814                  | 0.2334                       | 0.2113                         | 0.1897                         | 0.2269                       | 0.2265                     | 0.3859                 | 0.4008                      | 0.3995                     | 0.3955                     | 0.2251                           | 0.1915                                | 0.2399                      | 0.2005                       |
| <i>Thrips hawaiiensis</i>             | 0.1539              | 0.1461                    | -                         | 0.1655               | 0.1857               | 0.1665                  | 0.2149                       | 0.1875                         | 0.1958                         | 0.2119                       | 0.2140                     | 0.3931                 | 0.3902                      | 0.4127                     | 0.3969                     | 0.2096                           | 0.1791                                | 0.2213                      | 0.1962                       |
| <i>Thrips florum</i>                  | 0.1557              | 0.1674                    | 0.1480                    | -                    | 0.1820               | 0.1935                  | 0.2338                       | 0.2205                         | 0.2006                         | 0.2337                       | 0.2507                     | 0.4030                 | 0.4045                      | 0.3996                     | 0.4353                     | 0.1937                           | 0.1842                                | 0.2366                      | 0.2365                       |
| <i>Thrips tabaci</i>                  | 0.1672              | 0.1959                    | 0.1640                    | 0.1606               | -                    | 0.2121                  | 0.2190                       | 0.2244                         | 0.2315                         | 0.2111                       | 0.2405                     | 0.3987                 | 0.4176                      | 0.3932                     | 0.4263                     | 0.2164                           | 0.2361                                | 0.2550                      | 0.2399                       |
| <i>Thrips subnudula</i>               | 0.1646              | 0.1605                    | 0.1489                    | 0.1702               | 0.1836               | -                       | 0.2123                       | 0.2204                         | 0.1958                         | 0.2166                       | 0.2322                     | 0.3963                 | 0.3915                      | 0.4094                     | 0.3739                     | 0.2044                           | 0.1809                                | 0.2576                      | 0.2265                       |
| <i>Frankliniella intonsa</i>          | 0.1992              | 0.1989                    | 0.1865                    | 0.1994               | 0.1888               | 0.1844                  | -                            | 0.2241                         | 0.2143                         | 0.2314                       | 0.2701                     | 0.4310                 | 0.4339                      | 0.4347                     | 0.4177                     | 0.2012                           | 0.2392                                | 0.2429                      | 0.2200                       |
| <i>Megalurothrips usitatus</i>        | 0.1767              | 0.1839                    | 0.1659                    | 0.1909               | 0.1939               | 0.1903                  | 0.1936                       | -                              | 0.0952                         | 0.1812                       | 0.2229                     | 0.4159                 | 0.4204                      | 0.3923                     | 0.4223                     | 0.2202                           | 0.2349                                | 0.2419                      | 0.2000                       |
| <i>Megalurothrips distalis</i>        | 0.1895              | 0.1673                    | 0.1723                    | 0.1759               | 0.1989               | 0.1721                  | 0.1860                       | 0.0893                         | -                              | 0.1765                       | 0.2690                     | 0.3651                 | 0.3837                      | 0.3682                     | 0.3713                     | 0.2042                           | 0.2239                                | 0.2363                      | 0.1986                       |
| <i>Scirtothrips dorsalis</i>          | 0.1940              | 0.1956                    | 0.1844                    | 0.2007               | 0.1834               | 0.1879                  | 0.1982                       | 0.1610                         | 0.1573                         | -                            | 0.2579                     | 0.4029                 | 0.4161                      | 0.3899                     | 0.3771                     | 0.1814                           | 0.2254                                | 0.2402                      | 0.2253                       |
| <i>Ayyaria chaetophora</i>            | 0.2120              | 0.1947                    | 0.1859                    | 0.2128               | 0.2052               | 0.1989                  | 0.2262                       | 0.1926                         | 0.2256                         | 0.2180                       | -                          | 0.4380                 | 0.4387                      | <b>0.4751</b>              | 0.4365                     | 0.2332                           | 0.2481                                | 0.2289                      | 0.2327                       |
| <i>Haplothrips</i> sp.                | 0.2891              | 0.3016                    | 0.3059                    | 0.3117               | 0.3091               | 0.3078                  | 0.3278                       | 0.3190                         | 0.2887                         | 0.3117                       | 0.3308                     | -                      | 0.0887                      | 0.1498                     | 0.2161                     | 0.3980                           | 0.4064                                | 0.3587                      | 0.3866                       |
| <i>Haplothrips bagrolis</i>           | 0.2913              | 0.3103                    | 0.3042                    | 0.3125               | 0.3199               | 0.3050                  | 0.3294                       | 0.3218                         | 0.3002                         | 0.3193                       | 0.3317                     | 0.0832                 | -                           | 0.1486                     | 0.2113                     | 0.3931                           | 0.4229                                | 0.3710                      | 0.3931                       |
| <i>Haplothrips andresi</i>            | 0.3142              | 0.3096                    | 0.3174                    | 0.3098               | 0.3059               | 0.3155                  | 0.3297                       | 0.3051                         | 0.2906                         | 0.3040                       | <b>0.3518</b>              | 0.1358                 | 0.1348                      | -                          | 0.2579                     | 0.4114                           | 0.4195                                | 0.3905                      | 0.4061                       |
| <i>Phlaeothripidae</i> sp.            | 0.3038              | 0.3073                    | 0.3082                    | 0.3302               | 0.3250               | 0.2945                  | 0.3199                       | 0.3225                         | 0.2925                         | 0.2964                       | 0.3308                     | 0.1874                 | 0.1836                      | 0.2180                     | -                          | 0.3708                           | 0.4127                                | 0.3771                      | 0.4228                       |
| <i>Dendrothripoides innoxius</i>      | 0.1751              | 0.1940                    | 0.1827                    | 0.1706               | 0.1877               | 0.1788                  | 0.1759                       | 0.1907                         | 0.1788                         | 0.1611                       | 0.1998                     | 0.3088                 | 0.3059                      | 0.3164                     | 0.2925                     | -                                | 0.2227                                | 0.2067                      | 0.2224                       |
| <i>Microcephalothrips abdominalis</i> | 0.1603              | 0.1684                    | 0.1591                    | 0.1625               | 0.2008               | 0.1606                  | 0.2032                       | 0.2016                         | 0.1931                         | 0.1946                       | 0.2103                     | 0.3136                 | 0.3231                      | 0.3212                     | 0.3174                     | 0.1922                           | -                                     | 0.2445                      | 0.2073                       |
| <i>Astrothrips tumiceps</i>           | 0.2027              | 0.2051                    | 0.1915                    | 0.2027               | 0.2161               | 0.2180                  | 0.2073                       | 0.2068                         | 0.2027                         | 0.2055                       | 0.1969                     | 0.2849                 | 0.2925                      | 0.3040                     | 0.2964                     | 0.1807                           | 0.2084                                | -                           | 0.2393                       |
| <i>Bathrips melanicornis</i>          | 0.1740              | 0.1752                    | 0.1723                    | 0.2019               | 0.2046               | 0.1950                  | 0.1898                       | 0.1752                         | 0.1740                         | 0.1941                       | 0.1989                     | 0.3021                 | 0.3059                      | 0.3136                     | 0.3231                     | 0.1922                           | 0.1797                                | 0.2046                      | -                            |



**Table S3.** A pairwise comparison of COI sequences of thrips species from Bangladesh during 2021-2023

[illegible]
